# Supplementary material for: SpectralTAD: an R package for defining a hierarchy of topologically associated domains using spectral clustering
Source: PubMed Central journal article supplement (PMC7372752; doi:10.1186/s12859-020-03652-w), 2020-07-20
Supplement: 12859_2020_3652_MOESM13_ESM.pdf [file 12859_2020_3652_MOESM13_ESM.pdf]

|           | Primary vs. Secondary |           |         | Primary vs. Tertiary |          |         | Secondary vs. Tertiary |          |         |
|-----------|-----------------------|-----------|---------|----------------------|----------|---------|------------------------|----------|---------|
|           | Primary               | Secondary | P-value | Primary              | Tertiary | P-value | Secondary              | Tertiary | P-value |
| Cell Line | 0.42                  | 0.40      | 0.0001  | 0.42                 | 0.35     | <0.0001 | 0.40                   | 0.35     | <0.0001 |
| Tissue    | 0.22                  | 0.21      | 0.0003  | 0.22                 | 0.18     | <0.0001 | 0.21                   | 0.18     | <0.0001 |
| P-value   | <0.0001               | <0.0001   |         | <0.0001              | <0.0001  |         | <0.0001                | <0.0001  |         |

  

|           | Level 1 vs. Level 2 |         |         | Level 1 vs. Level 3 |         |         | Level 2 vs. Level 3 |         |         |
|-----------|---------------------|---------|---------|---------------------|---------|---------|---------------------|---------|---------|
|           | Level 1             | Level 2 | P-value | Level 1             | Level 3 | P-value | Level 2             | Level 3 | P-value |
| Cell Line | 0.23                | 0.23    | 0.0347  | 0.23                | 0.30    | <0.0001 | 0.23                | 0.30    | <0.0001 |
| Tissue    | 0.12                | 0.10    | <0.0001 | 0.12                | 0.13    | 0.0600  | 0.10                | 0.13    | <0.0001 |
| P-value   | <0.0001             | <0.0001 |         | <0.0001             | <0.0001 |         | <0.0001             | <0.0001 |         |
